# Supplementary material for: Assessment of published models and prognostic variables in epithelial ovarian cancer at Mayo Clinic
Source: PubMed Central journal article supplement (PMC4380608; doi:10.1016/j.ygyno.2015.01.539), 2015-01-22
Supplement: NIHMS662821-supplement.pdf [file NIHMS662821-supplement.pdf]

Supplemental Table 1

| Multivariable model of Stage and Debulking                                   |                          |       |            |         |               |        |            |         |               |
|------------------------------------------------------------------------------|--------------------------|-------|------------|---------|---------------|--------|------------|---------|---------------|
|                                                                              |                          | OS HR | 95% CI     | p-value | c-index       | PFS HR | 95% CI     | p-value | c-index       |
| Stage                                                                        | I                        | ref   |            |         | 0.696         | Ref    |            |         | 0.684         |
|                                                                              | II                       | 2.23  | 0.92-5.38  | 0.075   |               | 2.06   | 0.97-4.35  | 0.060   |               |
|                                                                              | III                      | 4.78  | 2.32-9.84  | <0.0001 |               | 5.95   | 3.29-10.74 | <0.0001 |               |
|                                                                              | IV                       | 7.54  | 3.55-15.98 | <0.0001 |               | 9.32   | 5.01-17.33 | <0.0001 |               |
| Debulking                                                                    | No residual disease      | ref   |            |         |               | Ref    |            |         |               |
|                                                                              | 0-1 cm                   | 2.00  | 1.57-2.55  | <0.0001 |               | 1.89   | 1.53-2.33  | <0.0001 |               |
|                                                                              | >1 cm                    | 2.54  | 1.86-3.48  | <0.0001 |               | 1.86   | 1.39-2.50  | <0.0001 |               |
| Prognostic Performance of Variables After Adjustment for Stage and Debulking |                          |       |            |         |               |        |            |         |               |
|                                                                              |                          | OS HR | 95% CI     | p-value | Model c-index | PFS HR | 95% CI     | p-value | Model c-index |
| Morphology                                                                   | Serous                   | ref   |            |         | 0.700         | Ref    |            |         | 0.686         |
|                                                                              | Endometrioid             | 0.79  | 0.50-1.26  | 0.32    |               | 0.57   | 0.35-0.90  | 0.016   |               |
|                                                                              | Clear Cell               | 2.13  | 1.15-3.94  | 0.017   |               | 2.19   | 1.23-3.89  | 0.0079  |               |
|                                                                              | Mixed / other            | 0.79  | 0.47-1.32  | 0.37    |               | 0.87   | 0.55-1.37  | 0.56    |               |
| Grade                                                                        | Low                      | ref   |            |         | 0.700         | ref    |            |         | 0.689         |
|                                                                              | High                     | 1.30  | 0.86-1.96  | 0.22    |               | 1.66   | 1.13-2.44  | 0.010   |               |
| Ascites                                                                      | Absent                   | ref   |            |         | 0.715         | ref    |            |         | 0.704         |
|                                                                              | Present                  | 1.37  | 1.06-1.77  | 0.017   |               | 1.27   | 1.01-1.58  | 0.040   |               |
| ASA Score                                                                    | 1-2                      | ref   |            |         | 0.712         | ref    |            |         | 0.700         |
|                                                                              | 3-4                      | 1.47  | 1.11-1.95  | 0.0064  |               | 1.28   | 1.01-1.63  | 0.044   |               |
| ECOG PS                                                                      | 0                        | ref   |            |         | 0.715         | Ref    |            |         | 0.698         |
|                                                                              | 1                        | 1.29  | 0.92-1.80  | 0.14    |               | 1.10   | 0.82-1.47  | 0.52    |               |
|                                                                              | 2-4                      | 2.83  | 1.75-4.57  | <0.001  |               | 1.56   | 0.98-2.47  | 0.059   |               |
| Surgical Complexity Score                                                    | Low (0-3)                | ref   |            |         | 0.700         | Ref    |            |         | 0.693         |
|                                                                              | Intermediate (4-7)       | 0.76  | 0.51-1.13  | 0.18    |               | 0.94   | 0.65-1.37  | 0.76    |               |
|                                                                              | High (8+)                | 0.83  | 0.54-1.28  | 0.39    |               | 1.06   | 0.72-1.57  | 0.77    |               |
| OC Use                                                                       | No                       | ref   |            |         | 0.703         | Ref    |            |         | 0.692         |
|                                                                              | Yes                      | 0.81  | 0.65-1.01  | 0.061   |               | 0.95   | 0.78-1.16  | 0.63    |               |
| Post Menopausal                                                              | No                       | ref   |            |         | 0.699         | Ref    |            |         | 0.692         |
|                                                                              | Yes                      | 1.14  | 0.85-1.53  | 0.38    |               | 1.10   | 0.84-1.43  | 0.48    |               |
| Number of pregnancies                                                        | 0                        | ref   |            |         | 0.703         | Ref    |            |         | 0.702         |
|                                                                              | 1                        | 1.15  | 0.67-1.97  | 0.61    |               | 1.02   | 0.64-1.64  | 0.93    |               |
|                                                                              | 2                        | 1.60  | 1.08-2.37  | 0.020   |               | 1.28   | 0.90-1.81  | 0.17    |               |
|                                                                              | 3+                       | 1.28  | 0.89-1.84  | 0.18    |               | 1.11   | 0.81-1.52  | 0.53    |               |
| BRCA 1/2 Carrier                                                             | No                       | ref   |            |         | 0.738         | Ref    |            |         | 0.703         |
|                                                                              | Yes                      | 0.72  | 0.40-1.30  | 0.28    |               | 0.76   | 0.47-1.22  | 0.24    |               |
| Family History                                                               | No                       | ref   |            |         | 0.699         | Ref    |            |         | 0.693         |
|                                                                              | Yes                      | 0.77  | 0.59-0.99  | 0.045   |               | 0.88   | 0.70-1.11  | 0.29    |               |
| BMI                                                                          | Normal/Underweight (<25) | ref   |            |         | 0.699         | Ref    |            |         | 0.700         |
|                                                                              | Overweight (25.0-29.9)   | 0.97  | 0.74-1.27  | 0.84    |               | 1.22   | 0.96-1.56  | 0.10    |               |
|                                                                              | Obese (30+)              | 0.92  | 0.70-1.19  | 0.52    |               | 1.12   | 0.89-1.42  | 0.34    |               |
| Albumin, log2                                                                |                          | 0.75  | 0.38-1.50  | 0.42    | 0.710         | 0.43   | 0.23-0.81  | 0.0093  | 0.704         |
| Age, per 10 years                                                            |                          | 1.16  | 1.05-1.28  | 0.0036  | 0.705         | 1.09   | 1.00-1.19  | 0.055   | 0.686         |
| CA125 pre-surgery, log2                                                      |                          | 0.96  | 0.91-1.01  | 0.14    | 0.703         | 0.99   | 0.95-1.05  | 0.84    | 0.691         |
| BMI                                                                          |                          | 0.99  | 0.97-1.01  | 0.15    | 0.703         | 1.00   | 0.98-1.01  | 0.90    | 0.693         |
| Alk phosphate, natural log                                                   |                          | 1.07  | 0.72-1.57  | 0.75    | 0.697         | 0.78   | 0.55-1.12  | 0.19    | 0.679         |
| Platelets, per 100 count                                                     |                          | 1.05  | 0.96-1.14  | 0.30    | 0.706         | 0.99   | 0.92-1.07  | 0.86    | 0.694         |
| Hemoglobin                                                                   |                          | 0.96  | 0.83-1.10  | 0.53    | 0.707         | 0.92   | 0.81-1.05  | 0.22    | 0.706         |
